# Supplementary material for: Metabolic Signatures in Response to Abscisic Acid (ABA) Treatment in Brassica napus Guard Cells Revealed by Metabolomics
Source: PubMed Central journal article supplement (PMC5634414; doi:10.1038/s41598-017-13166-w), 2017-10-09
Supplement: 41598_2017_13166_MOESM1_ESM.pdf [file 41598_2017_13166_MOESM1_ESM.pdf]

# **Metabolic Signatures in Response to Abscisic Acid (ABA) Treatment in *Brassica napus* Guard Cells Revealed by Metabolomics**

Mengmeng Zhu, Sarah M. Assmann

## **Supplementary information**

**Supplemental Figure S1.** Mapping of identified metabolites from *B. napus* guard cells into KEGG metabolic pathways. Black dots represent mapped metabolites.

**Supplemental Figure S2.** Principal component analysis using all detected features from the combined GC-MS/MS and LC-MS/MS data sets.

**Supplemental Table 1.** Metabolites of *B. napus* guard cells identified from GC-MS/MS and LC-MS/MS platforms.

**Supplemental Table 2.** ABA-responsive metabolites in *B. napus* guard cell revealed by non-targeted metabolomics.

**Supplemental Table 3.** Pathway enrichment analysis report generated from MetaboAnalyst.

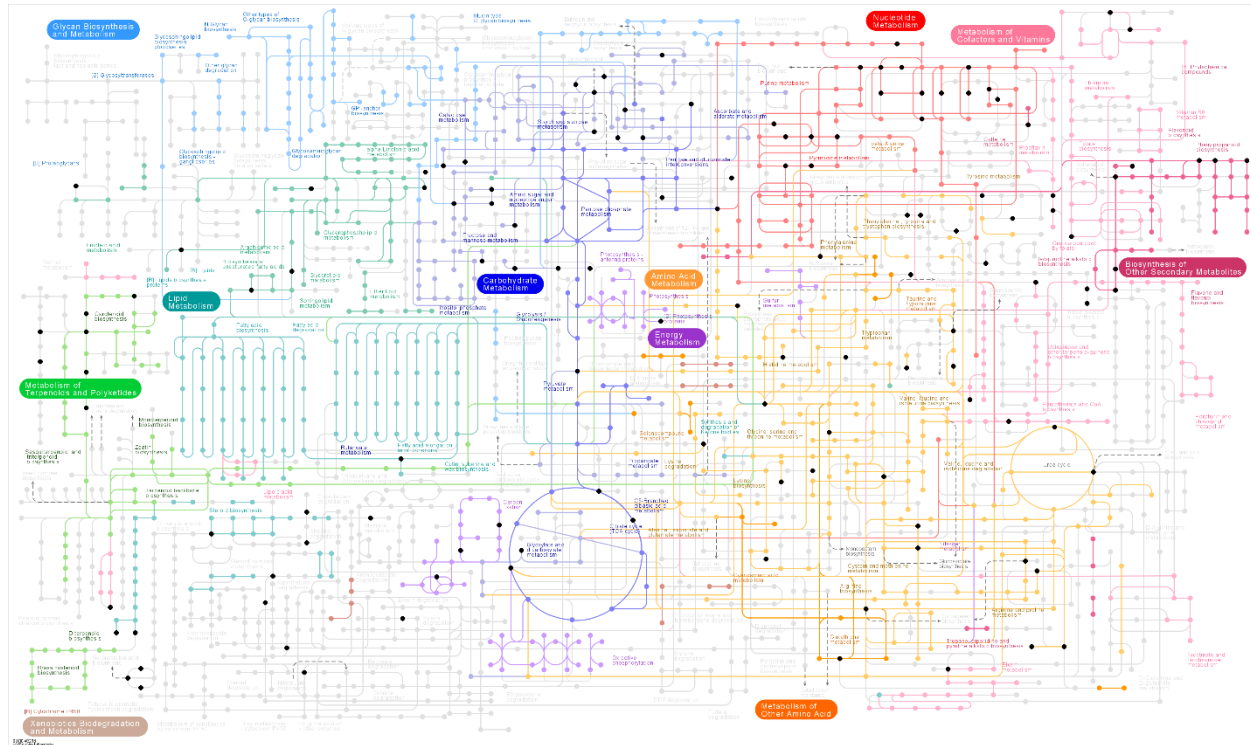

**Supplemental Figure S1.** Mapping of identified metabolites from *B. napus* guard cells into KEGG metabolic pathways. Black dots represent mapped metabolites.

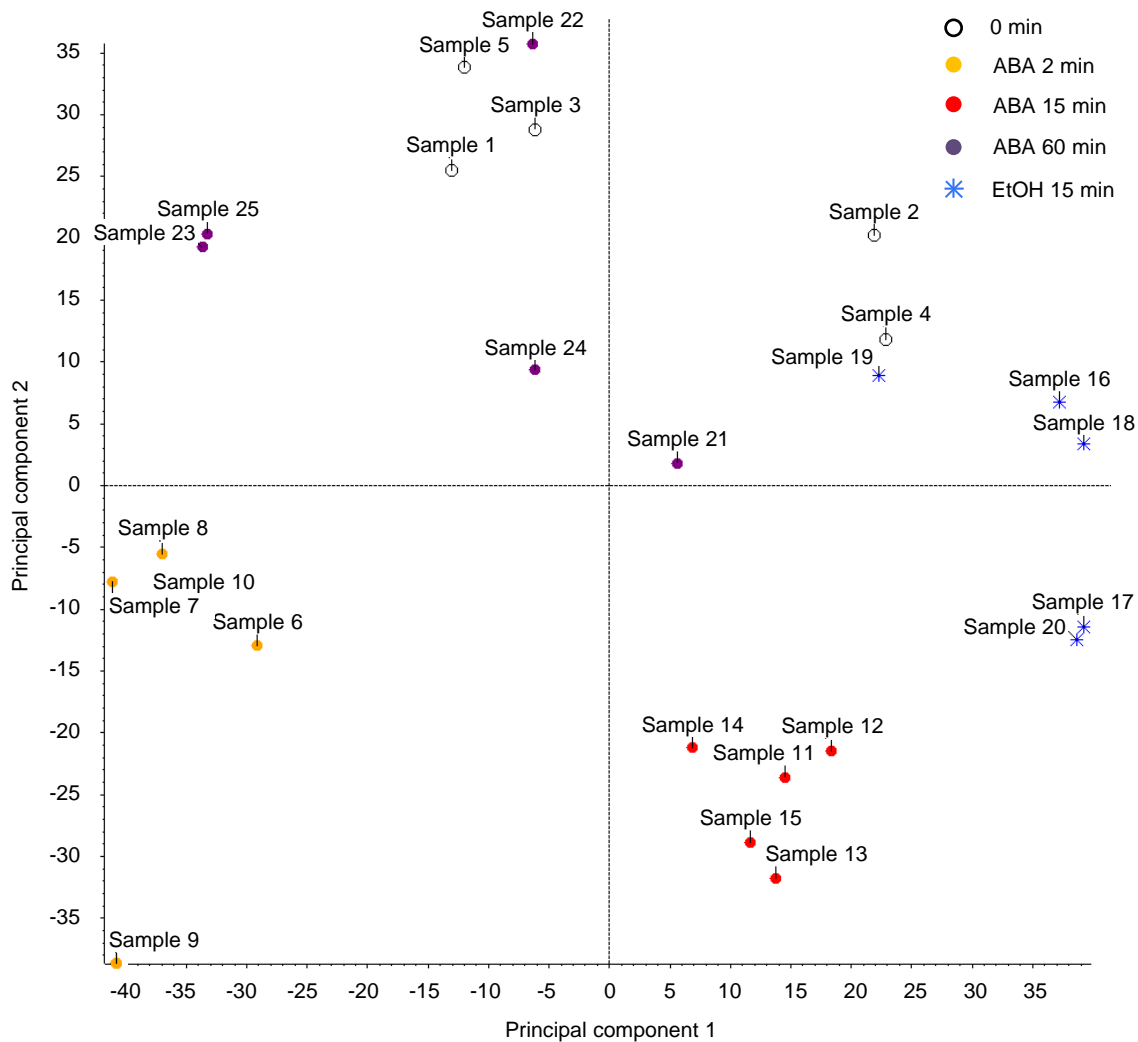

**Supplemental Figure S2.** Principal component analysis using all detected features from the combined GC-MS/MS and LC-MS/MS data sets.
